# Supplementary material
Source: PubMed Central journal article supplement (PMC3576323)
Supplement: supp_djs525_jnci_JNCI_12_1205_s01.pdf [file supp_djs525_jnci_JNCI_12_1205_s01.pdf]

**Supplementary Table 1.** Verification of primary cancers observed following endometrial cancer in mismatch repair gene mutation carriers

| Site of cancer  | Pathology report | Medical record | Death certificate | Cancer registry | Self or relative report | Unknown | Total |
|-----------------|------------------|----------------|-------------------|-----------------|-------------------------|---------|-------|
| Colorectum      | 36               | 1              | 0                 | 1               | 2                       | 0       | 40    |
| Kidney etc.*    | 7                | 0              | 0                 | 0               | 2                       | 0       | 9     |
| Urinary bladder | 4                | 0              | 1                 | 0               | 2                       | 0       | 7     |
| Breast          | 8                | 1              | 0                 | 0               | 3                       | 0       | 12    |
| Small intestine | 1                | 0              | 0                 | 1               | 1                       | 0       | 3     |
| Pancreas        | 3                | 0              | 0                 | 0               | 0                       | 0       | 3     |

\*Kidney etc. included kidney, renal pelvis and ureter.

**Supplementary Table 2.** Frequency of surveillance colonoscopy or sigmoidoscopy following endometrial cancer in mismatch repair gene mutation carriers

| Colonoscopy or sigmoidoscopy                  | All women           | Women diagnosed with colorectal cancer following endometrial cancer | Women not diagnosed with colorectal cancer following endometrial cancer |
|-----------------------------------------------|---------------------|---------------------------------------------------------------------|-------------------------------------------------------------------------|
| At least one, No. (%)                         | 64 (73)             | 5 (29)                                                              | 59 (83)                                                                 |
| Average frequency, No. (%)                    |                     |                                                                     |                                                                         |
| Every year                                    | 21 (44)             | 1 (33)                                                              | 20 (44)                                                                 |
| Every 2 years                                 | 12 (25)             | 1 (33)                                                              | 11 (24)                                                                 |
| Every 3 years                                 | 9 (19)              | 1 (33)                                                              | 8 (18)                                                                  |
| Every 4–5 years                               | 6 (12)              | 0 (0)                                                               | 6 (13)                                                                  |
| Unknown frequency                             | 16                  | 2                                                                   | 14                                                                      |
| Mean interval between endoscopies, y (95% CI) | 2.10 (1.70 to 2.51) | 2.00 (0.00 to 4.48)                                                 | 2.11 (1.69 to 2.54)                                                     |
| None, No. (%)                                 | 24 (27)             | 12 (71)                                                             | 12 (17)                                                                 |
| Missing, No.                                  | 29                  | 23                                                                  | 6                                                                       |
| Total*                                        | 117                 | 40                                                                  | 77                                                                      |

\*Of 127 women, 10 were excluded from this analysis for estimating colorectal cancer risk because we excluded one woman who was diagnosed with colorectal cancer at unknown age and nine women who reported having a polypectomy before or at their age at endometrial cancer diagnosis.

**Supplementary Table 3.** Details of colorectal cancer diagnosis following endometrial cancer in mismatch repair gene mutation carriers and their surveillance colonoscopy or sigmoidoscopy status\*

| Person ID | Age at diagnosis of endometrial cancer (years) | Colorectal cancer        |                  |        |          |                          |            | Sigmoidoscopy | Colonoscopy |
|-----------|------------------------------------------------|--------------------------|------------------|--------|----------|--------------------------|------------|---------------|-------------|
|           |                                                | Age at diagnosis (years) | ICD-O site code† | Grade‡ | T stage§ | Number of positive nodes | TNM stage§ |               |             |
| ID1       | 31                                             | 34                       | C20.9            | –      | –        | –                        | –          | no            | no          |
| ID2       | 59                                             | 72                       | C18.0            | 2      | 2        | 0                        | –          | no            | no          |
| ID5       | 40                                             | 46                       | C18.0            | 2      | 4        | 0                        | –          | no            | no          |
| ID15      | 39                                             | 59                       | C18.2            | 3      | 2        | 0                        | –          | no            | no          |
| ID17      | 50                                             | 52                       | C18.0            | 3      | 3        | 0                        | 2          | no            | no          |
| ID24      | 36                                             | 40                       | C18.4            | 2      | 3        | 0                        | –          | no            | no          |
| ID26      | 30                                             | 44                       | C18.0            | 2      | 3        | 0                        | –          | no            | no          |
| ID27      | 45                                             | 51                       | C18.0, C18.4     | 2      | 3        | 5                        | 3          | no            | no          |
| ID28      | 37                                             | 40                       | C18.0            | 2      | –        | –                        | 2          | no            | no          |
| ID33      | 47                                             | 55                       | C18.2            | 2      | 1        | 0                        | –          | no            | no          |
| ID35      | 44                                             | 49                       | C18.0            | 2      | 2        | 0                        | 1          | no            | no          |
| ID37      | 34                                             | 49                       | C18.2            | 3      | 2        | 1                        | 3          | no            | no          |
| ID3       | 33                                             | 34                       | C18.0            | –      | –        | –                        | –          | –             | –           |
| ID4       | 36                                             | 48                       | C18.0, C18.7     | –      | –        | –                        | –          | –             | –           |
| ID6       | 51                                             | 62                       | C18.2            | 1      | 2        | 0                        | –          | –             | –           |

|      |    |    |              |   |   |   |   |    |                      |
|------|----|----|--------------|---|---|---|---|----|----------------------|
| ID7  | 33 | 61 | C18.2        | - | - | - | - | -  | -                    |
| ID9  | 39 | 58 | C18.0        | - | 3 | 0 | - | -  | -                    |
| ID10 | 37 | 58 | C18.2        | - | - | - | - | -  | -                    |
| ID11 | 34 | 50 | C20.9        | - | - | - | - | -  | -                    |
| ID12 | 46 | 73 | C18.0, C18.2 | 3 | 3 | 0 | 2 | -  | -                    |
| ID13 | 56 | 80 | C18.9        | - | - | - | - | -  | -                    |
| ID14 | 58 | 60 | C18.2, C18.4 | 2 | 3 | 2 | - | -  | -                    |
| ID16 | 55 | 60 | C18.2, C18.4 | 3 | - | 0 | - | -  | -                    |
| ID18 | 51 | 55 | C20.9        | 2 | 2 | 0 | 1 | -  | -                    |
| ID20 | 38 | 61 | C20.9        | 2 | 3 | 0 | - | -  | -                    |
| ID21 | 48 | 55 | C26.0        | - | - | - | - | -  | -                    |
| ID22 | 53 | 63 | C18.0        | - | - | - | - | -  | -                    |
| ID23 | 54 | 62 | C18.2        | - | - | - | - | -  | -                    |
| ID25 | 50 | 62 | C20.9        | 2 | 1 | 0 | - | -  | -                    |
| ID29 | 48 | 62 | C18.7        | 2 | - | 0 | - | -  | -                    |
| ID30 | 47 | 53 | C18.2        | 3 | 3 | 3 | 3 | -  | -                    |
| ID31 | 46 | 50 | C18.9        | 2 | 3 | 1 | - | -  | -                    |
| ID32 | 33 | 55 | C18.7        | 2 | 1 | 0 | - | -  | -                    |
| ID36 | 65 | 79 | C18.0        | 2 | 2 | 0 | - | -  | -                    |
| ID39 | 34 | 70 | C18.4, C18.6 | 2 | 3 | 0 | - | -  | -                    |
| ID8  | 47 | 58 | C20.9        | - | 4 | 0 | - | no | yes (every one year) |

|      |    |    |       |   |   |   |   |                         |                         |
|------|----|----|-------|---|---|---|---|-------------------------|-------------------------|
| ID38 | 43 | 52 | C18.6 | 2 | 3 | 2 | 3 | no                      | yes (every three years) |
| ID40 | 44 | 52 | C18.2 | 3 | 3 | 0 | 1 | no                      | yes (unknown frequency) |
| ID19 | 50 | 64 | C18.7 | – | – | – | – | yes (unknown frequency) | no                      |
| ID34 | 39 | 52 | C18.9 | 2 | 2 | 0 | – | yes (every two years)   | no                      |

\* ICD–O = International Classification of Diseases for Oncology; TMN = tumor–node–metastasis; – = unknown.

† ICD–O code reference: Fritz A, Percy C, Jack A, *et al.* International Classification of Diseases for Oncology (ICD–O). In: 3rd ed. Geneva: World Health Organization; 2000.

‡ Grade: 1 = well, 2 = moderate, 3 = poor, 4 = undifferentiated (reference: Hamilton SR, Aaltonen LA. Pathology and Genetics of Tumours of the Digestive System. In: Kleihues P, Sobin LH, (eds). *World Health Organization Classification of Tumours*. Lyon, France: International Agency for Research on Cancer; 2000.)

§ Edge SB, Byrd DR, Compton CC, Fritz AG, Greene FL, Trotti A. AJCC Cancer Staging Manual. In: 7th ed. New York, NY: Springer; 2010.

**Supplementary Table 4.** Comparisons of cancer risks between mismatch repair gene mutation carriers who had a previous diagnosis of endometrial cancer and those without any previous cancer diagnosis\*

| Cancer Site     | With a previous diagnosis of endometrial cancer | Without a previous diagnosis of any cancer‡ |
|-----------------|-------------------------------------------------|---------------------------------------------|
|                 | SIR (95% CI)                                    | SIR (95% CI)                                |
| Colorectum      | 39.9 (27.2 to 58.3)                             | 20.5 (11.7 to 33.3)                         |
| Kidney etc.†    | 28.3 (11.9 to 48.6)                             | 11.2 (2.31 to 32.8)                         |
| Urinary bladder | 24.3 (8.56 to 42.9)                             | 9.51 (1.15 to 34.4)                         |
| Breast          | 2.51 (1.17 to 4.14)                             | 3.95 (1.59 to 8.13)                         |
| Small intestine | 63.0 (0.00 to 150)                              | NA NA                                       |
| Pancreas        | 8.61 (0.00 to 20.5)                             | 10.7 (2.68 to 47.7)                         |

\* SIR = standardized incidence ratio; CI = confidence interval; NA = not available

† Kidney etc. included kidney, renal pelvis, and ureter.

‡ Reference: Win AK, Young JP, Lindor NM, *et al.* Colorectal and other cancer risks for carriers and non-carriers of a DNA mismatch repair gene mutation from mutation carrying families: a prospective cohort study. *J Clin Oncol.* 2012;30(9):958–964.

**Supplementary Table 5.** Comparisons between cancer risks following endometrial cancer and cancer risks following colorectal cancer for mismatch repair gene mutation\*

| Cancer Site     | Cancer risks following endometrial cancer | Cancer risks following colorectal cancer† |
|-----------------|-------------------------------------------|-------------------------------------------|
|                 | SIR (95% CI)                              | SIR (95% CI)                              |
| Colorectum      | 39.9 (27.2 to 58.3)                       | NA NA                                     |
| Kidney etc.‡    | 28.3 (11.9 to 48.6)                       | 14.9 (6.80 to 24.8)                       |
| Urinary bladder | 24.3 (8.56 to 42.9)                       | 14.4 (6.03 to 24.3)                       |
| Breast          | 2.51 (1.17 to 4.14)                       | 1.76 (1.07 to 2.59)                       |
| Small intestine | 63.0 (0.00 to 150)                        | 37.9 (8.48 to 82.2)                       |
| Pancreas        | 8.61 (0.00 to 20.5)                       | 2.64 (0.00 to 6.91)                       |

\* SIR = standardized incidence ratio; CI = confidence interval; NA = not available

† Reference: Win AK, Lindor NM, Young JP, *et al.* Risks of primary extracolonic cancers following colorectal cancer in Lynch syndrome. *J Natl Cancer Inst.* 2012;104(18):1363-1372.

‡ Kidney etc. included kidney, renal pelvis, and ureter.
